# Supplementary material for: T'ai chi for the treatment of osteoarthritis: a systematic review and meta-analysis
Source: PubMed Central journal article supplement — BMJ Open. 2011 Mar 28;1(1):e000035. doi: 10.1136/bmjopen-2010-000035 (PMC3191392; doi:10.1136/bmjopen-2010-000035), 2011-03-28
Supplement: bmjopen-2010-000035-s2.pdf [file bmjopen-2010-000035-s2.pdf]

## Supplement 1. Search strategies

### *MEDLINE (OvidSP)*

- 1 Osteoarthritis/
- 2 Degenerative arthritis /
- 3 Osteoarthrosis/
- 4 Knee pain/
- 5 Hip pain/
- 6 Arthritis/
- 7 osteo\$.tw.
- 8 or/1-7
- 9 Tai chi/
- 10 exp tai chi chuan/
- 11 (tai chi or tai adj chi or tai chi chuan).tw.
- 12 or/8-11
- 13 and/8,12
- 14 exp Animals/ not Humans/
- 15 13 not 14

### *The Cochrane Library (Wiley Online Library)*

- #1 MeSH descriptor Osteoarthritis, this term only
- #2 MeSH descriptor Degenerative arthritis, this term only
- #3 MeSH descriptor Osteoarthrosis, this term only
- #4 MeSH descriptor Knee pain, this term only
- #5 MeSH descriptor Hip pain, this term only
- #6 MeSH descriptor Arthritis, this term only
- #7 MeSH descriptor Hip pain, this term only
- #8 (osteo\*):ti,ab,kw
- #9 (#1 OR #2 OR #3 OR #4 OR #5 OR #6 OR #7 OR #8)
- #10 MeSH descriptor Tai chi, this term only
- #11 MeSH descriptor Tai chi chuan explode all trees
- #12 (tai chi or tai adj chi or tai chi chuan):ti,ab,kw
- #13 (#10 OR #11 OR #12)
- #14 (#9 AND #13) (Clinical Trials)
